# Supplementary material
Source: Springer Nature journal article supplement (https://www.springermedizin.de/resource/supplementary/12891_2012_1612_MOESM1_ESM.pdf/9508640)
Supplement: MOESM1 [file 9508640]

### Trainingsumfang

Siehe Studienprotokoll.

### Trainingsparameter

-  Die **Trainingszeit** wird am Gerät eingestellt. Wählen Sie aus den unten beschriebenen Übungen drei pro Übungsreihe aus. Führen Sie jede Übung 1 Minute durch.
-  Die **Amplitude**, also die Auslenkung der Trainingsplattform nach oben oder unten, wird über die Fußposition gewählt. Je weiter die Fußposition, desto anspruchsvoller das Training.
-  Die **Trainingsfrequenz** wird am Gerät eingestellt und wird bestimmt durch das Trainingsziel (Mobilisation, Training der Muskelfunktion oder Steigerung der Muskelleistung).

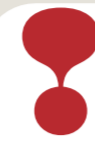

### Hinweise

- **Vor dem ersten Training:**  
Ausschluss von Gegenanzeigen und Einweisung durch einen geschulten Betreuer.
- Kopf soll nicht mitvibrieren!  
Abhilfe: Engere Fußposition wählen oder Knie beugen!
- Keine durchgestreckten Knie bei Fußpositionen über Position 2,5.
- Fußposition immer symmetrisch um Position 0 einnehmen.
- Alle Übungen langsam und bewusst durchführen.

## Tag 4 bis 10

### Übung 1

 5:00  10/16 Hz  1-2

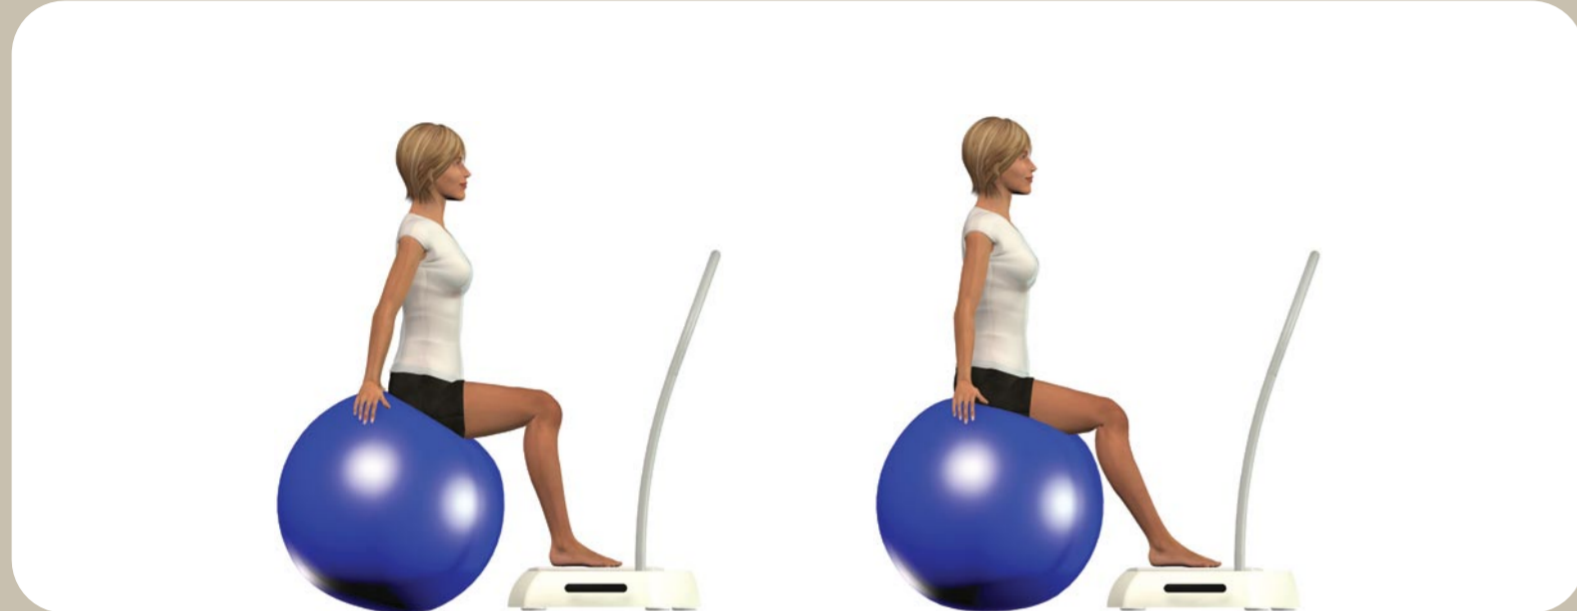

#### 3 | Sitz auf Gymnastikball

Aufrechter Sitz.  
Ball durch Beugen und Strecken der Knie vor- und zurückrollen.  
Oberkörper bleibt aufrecht.  
4 Sekunden vorwärts – 4 Sekunden rückwärts.

### Übung 2

 5:00  10/16 Hz  1-2

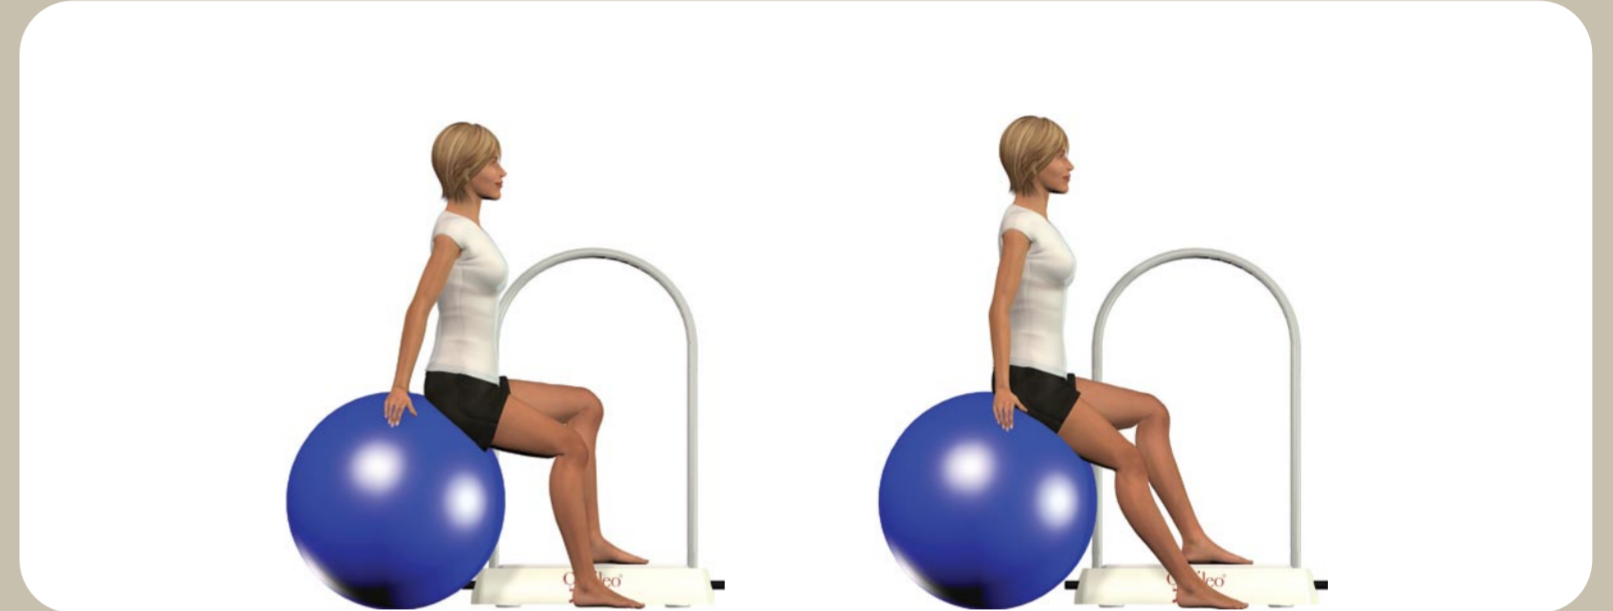

#### 9 | Sitz auf Gymnastikball einbeinig

Aufrechter Sitz quer vor Galileo.  
Ein Fuß auf die Trainingsplattform, Sprunggelenk auf Position 0!  
Ball durch Beugen und Strecken der Knie vor- und zurückrollen.  
Oberkörper bleibt aufrecht.  
4 Sekunden vorwärts – 4 Sekunden rückwärts.

## Tag 14 bis 21

### Übung 1

 3:00  18-24 Hz  1-2,5

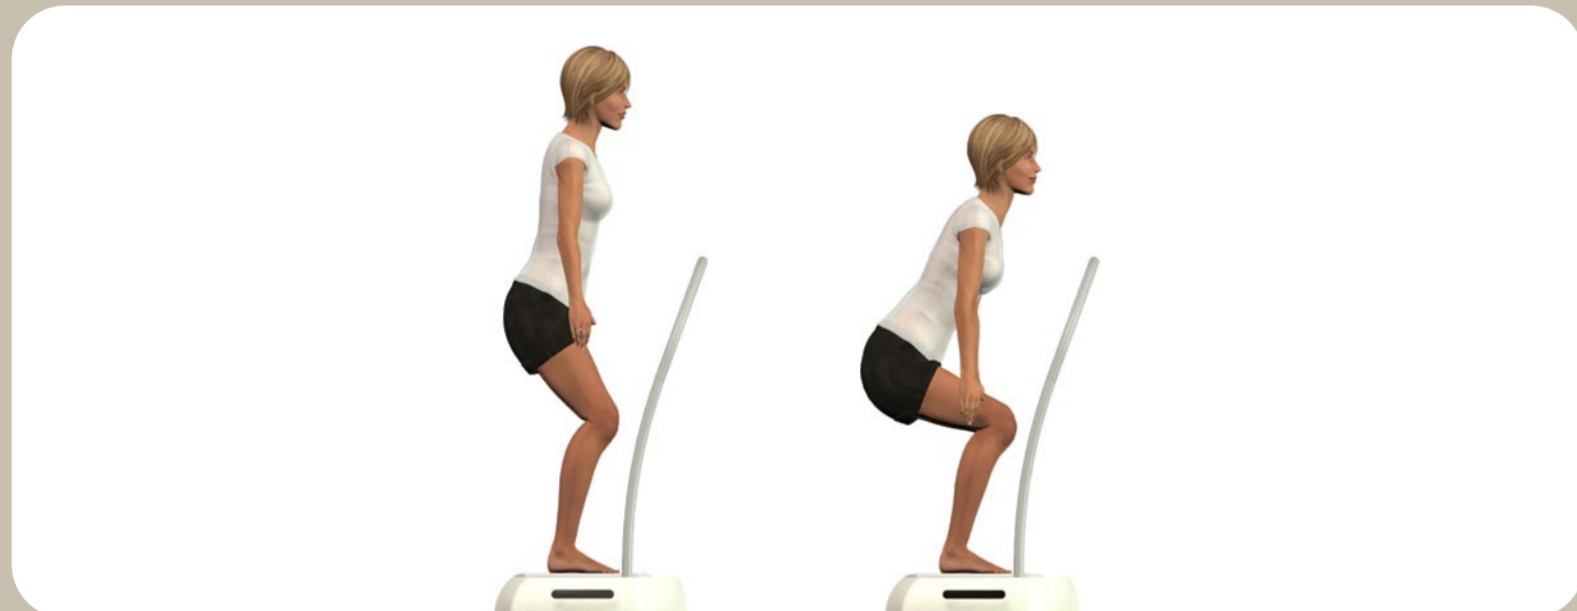

#### B | Kniebeuge beidbeinig

Oberkörper aufrecht.  
Arme hängen entspannt.  
In die Hocke gehen – Fersen bleiben unten!  
4 Sekunden abwärts – 4 Sekunden aufwärts.  
Auf Beinachse achten!

### Übung 2

 3:00  18-24 Hz  1-2,5

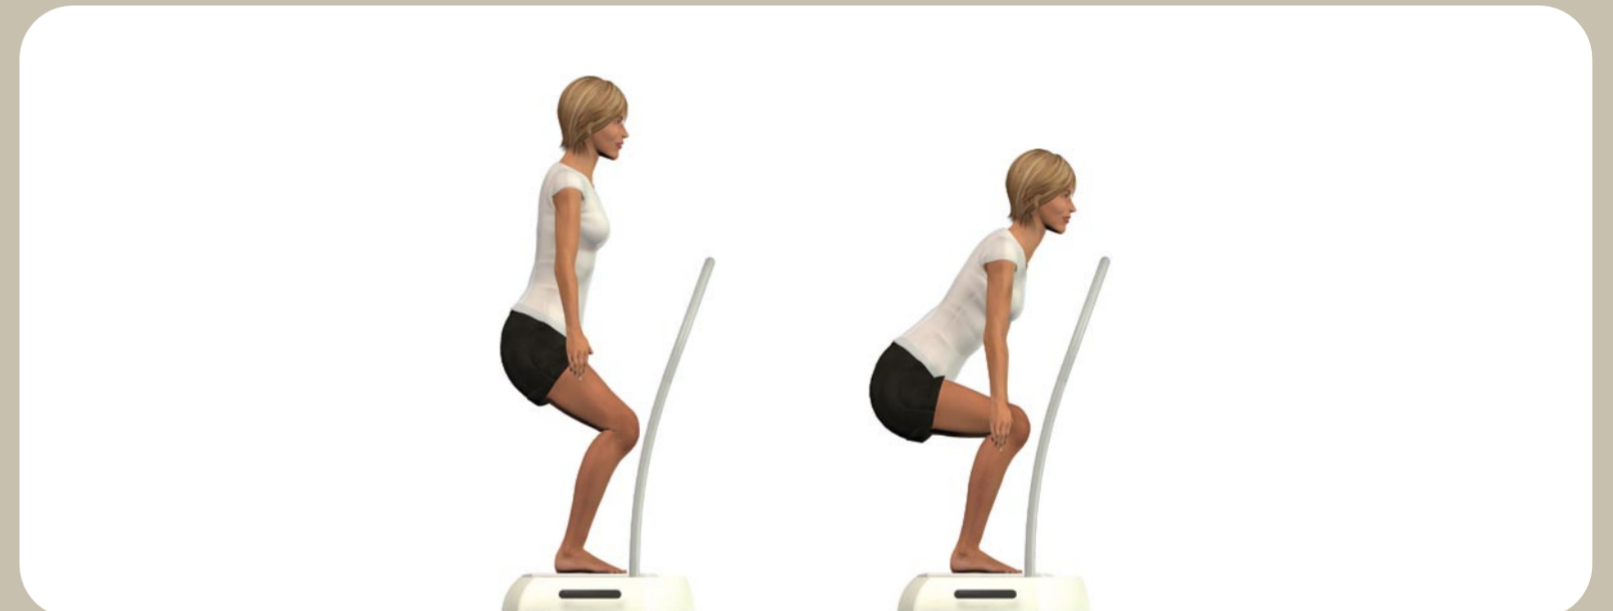

#### 23 | Kniebeuge beidbeinig tief

Tiefe Hockposition einnehmen.  
Fersen bleiben unten!  
Um diese Position 10 cm aufwärts und abwärts bewegen.  
4 Sekunden abwärts – 4 Sekunden aufwärts.  
Auf Beinachse achten!

### Übung 3

 3:00  18-24 Hz  1-2,5

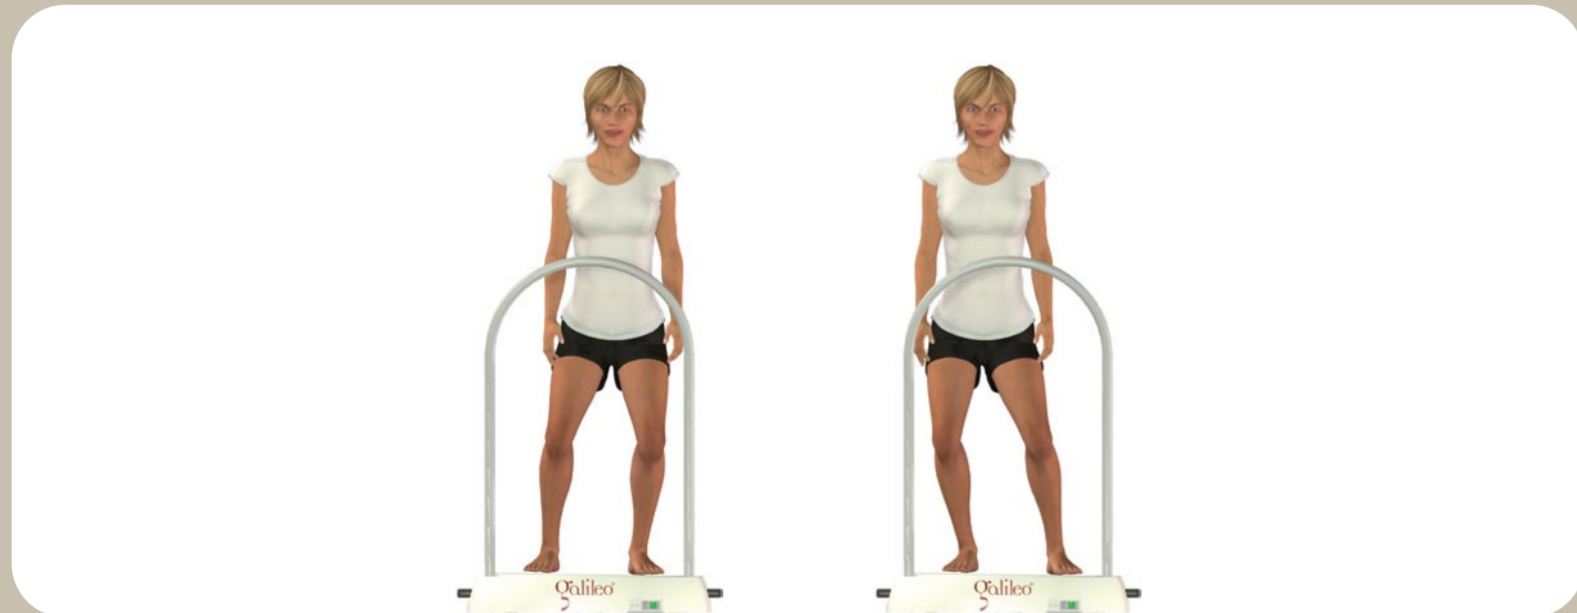

#### I | Gewichtsverlagerung

Oberkörper aufrecht.  
Körpergewicht zur Seite verlagern.  
Im Wechsel je 4 Sekunden pro Seite.  
Gegebenenfalls Augen schließen.  
Keine Seitneigung im Oberkörper!

### Übung 4

 3:00  18-24 Hz  1-2,5

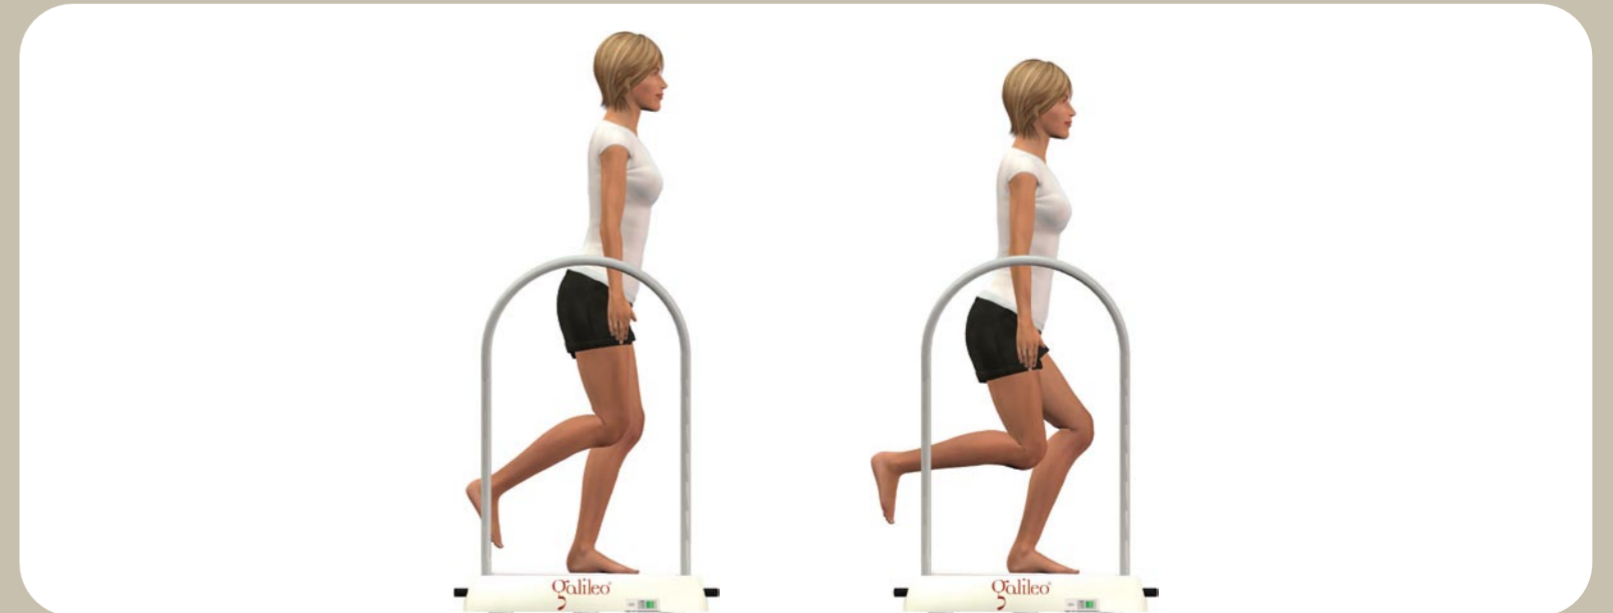

#### 42 | Kniebeuge einbeinig quer

Oberkörper aufrecht.  
Ein Bein anheben. Sprunggelenk auf Position 0!  
Langsame Kniebeuge ausführen. 4 Sek. abwärts – 4 Sek. aufwärts.  
Nach der Hälfte der Trainingszeit Bein wechseln.  
Auf Beinachse achten!

Insg. 3 Übungsreihen: 2 Minuten Pause nach jeder Übungsreihe, dann Übung 1-4 wiederholen!



## Trainingsumfang

Siehe Studienprotokoll.

## Trainingsparameter

-  Die **Trainingszeit** wird am Gerät eingestellt. Wählen Sie aus den unten beschriebenen Übungen drei pro Übungsreihe aus. Führen Sie jede Übung 1 Minute durch.
-  Die **Amplitude**, also die Auslenkung der Trainingsplattform nach oben oder unten, wird über die Fußposition gewählt. Je weiter die Fußposition, desto anspruchsvoller das Training.
-  Die **Trainingsfrequenz** wird am Gerät eingestellt und wird bestimmt durch das Trainingsziel (Mobilisation, Training der Muskelfunktion oder Steigerung der Muskelleistung).

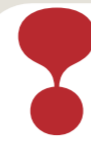

## Hinweise

- **Vor dem ersten Training:**  
Ausschluss von Gegenanzeigen und Einweisung durch einen geschulten Betreuer.
- Kopf soll nicht mitvibrieren!  
Abhilfe: Engere Fußposition wählen oder Knie beugen!
- Keine durchgestreckten Knie bei Fußpositionen über Position 2,5.
- Fußposition immer symmetrisch um Position 0 einnehmen.
- Alle Übungen langsam und bewusst durchführen.

## Woche 4 bis 6

### Übung 1

 3:00  18–24 Hz  2–3

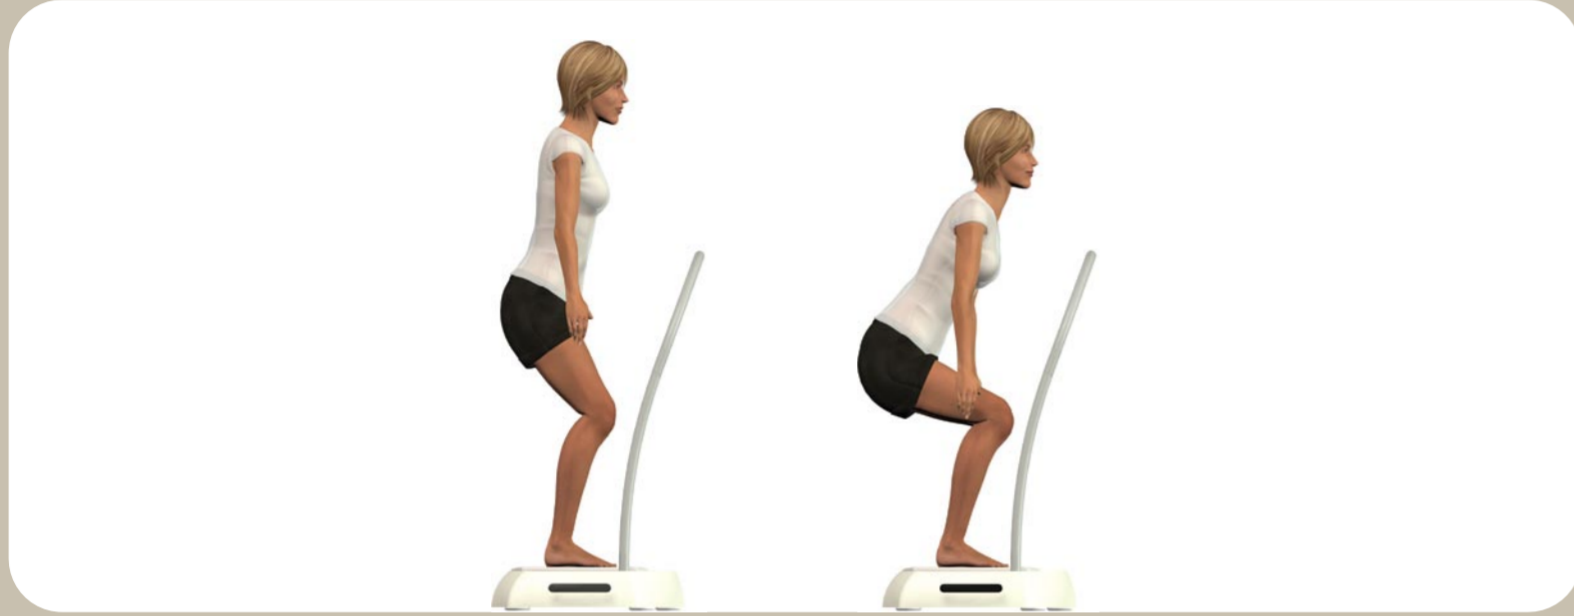

#### B | Kniebeuge beidbeinig

Oberkörper aufrecht.  
Arme hängen entspannt.  
In die Hocke gehen – Fersen bleiben unten!  
4 Sekunden abwärts – 4 Sekunden aufwärts.  
Auf Beinachse achten!

### Übung 2

 3:00  18–24 Hz  2–3

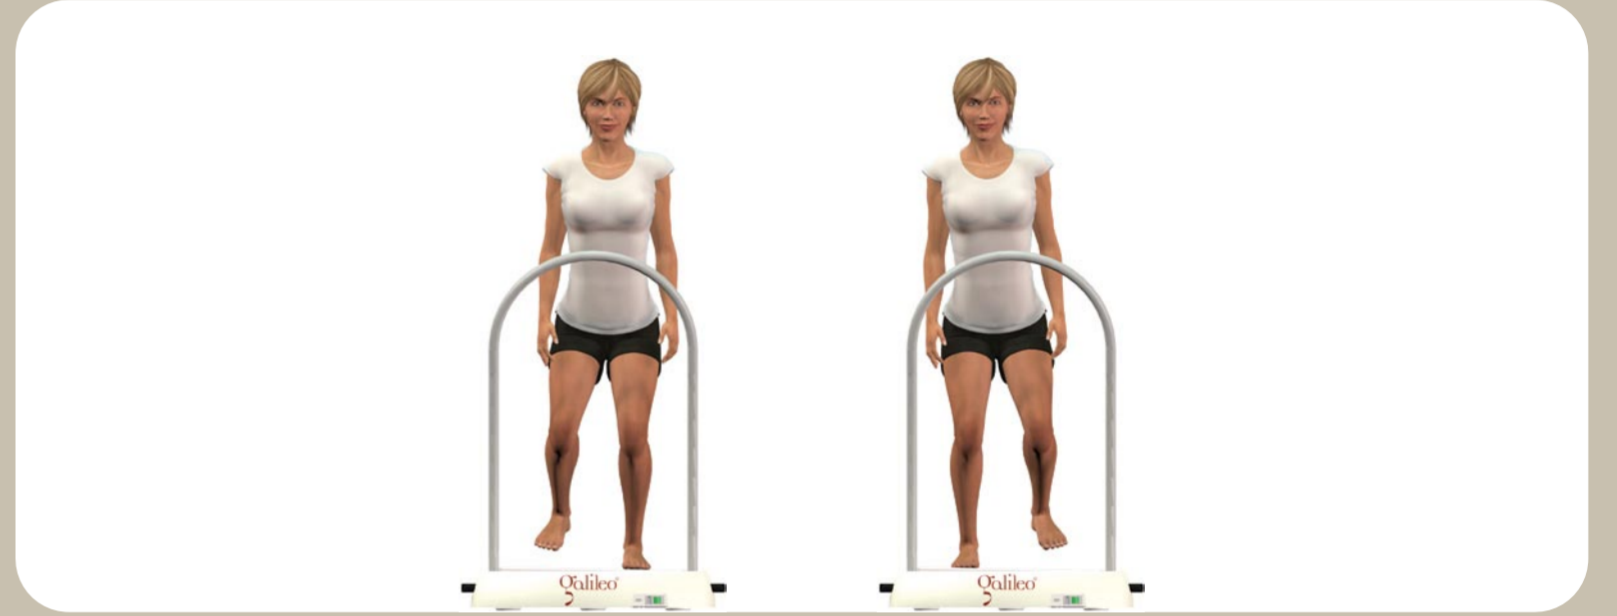

#### 43 Hüften im Wechsel

Oberkörper aufrecht.  
Im Wechsel auf linkes und rechtes Bein hüpfen.  
Keine Seitneigung im Oberkörper!

### Übung 3

 3:00  18–24 Hz  2–3

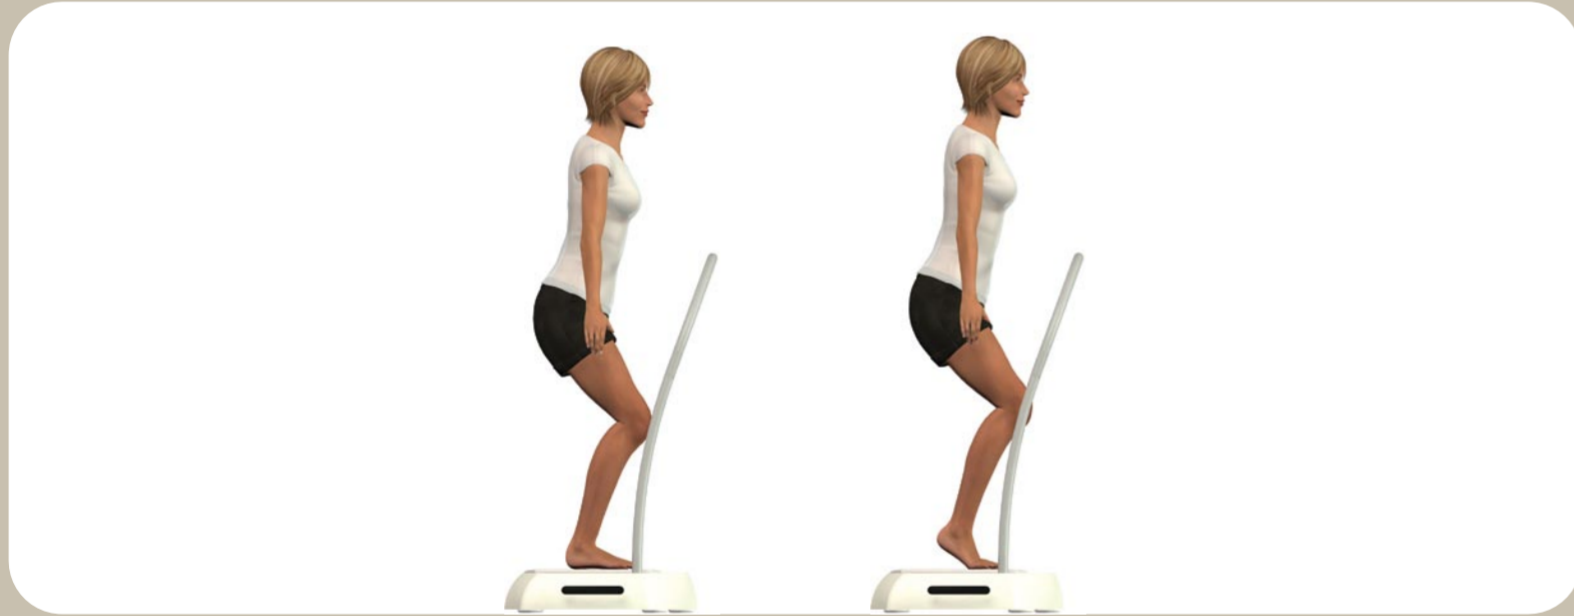

#### I | Wadentraining Kniebeuge beidbeinig

Oberkörper aufrecht. Knie stark beugen.  
Fersen so weit wie möglich anheben.  
Endposition 20 Sekunden halten.  
Fersen langsam in Ausgangsposition zurück.  
Übung wiederholen.

### Übung 4

 3:00  18–24 Hz  2–3

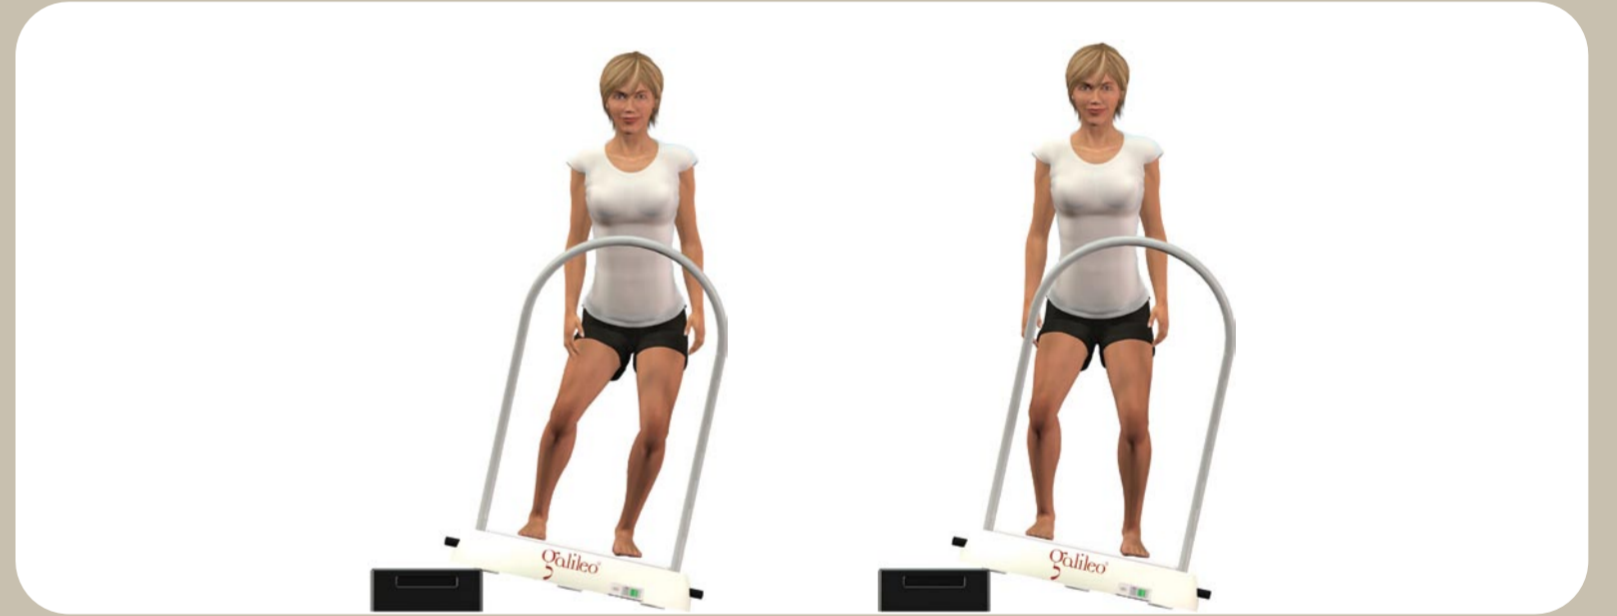

#### I 0 Gewichtsverlagerung einseitig unterlegt

Galileo einseitig unterlagern.  
Oberkörper aufrecht.  
Körpergewicht zur Seite verlagern.  
Im Wechsel je 4 Sekunden pro Seite.  
Keine Seitneigung im Oberkörper!

### Übung 5

 3:00  18–24 Hz  2–3

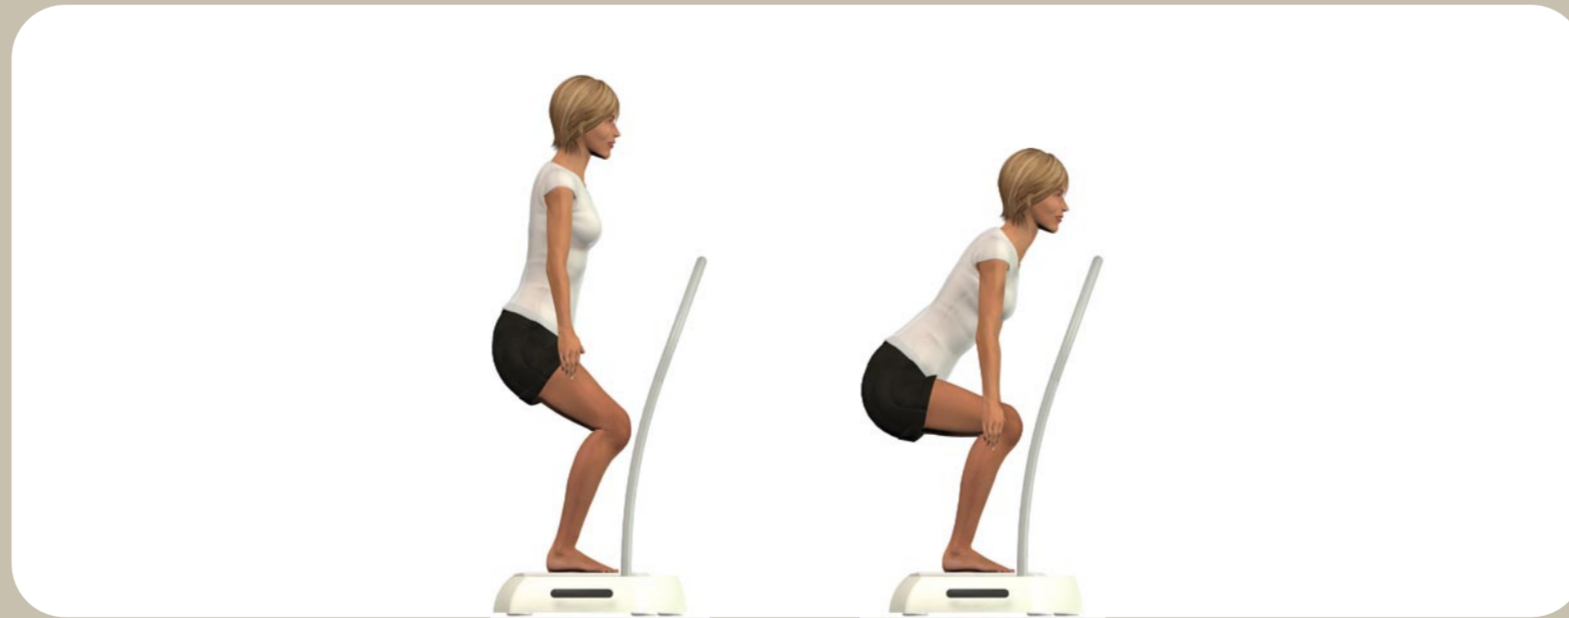

#### 23 Kniebeuge beidbeinig tief

Tiefe Hockposition einnehmen (45°–90°).  
Fersen bleiben unten!  
Tiefe Hocke solange wie möglich halten.  
Auf Beinachse achten!

Insg. 3 Übungsreihen: 2 Minuten Pause nach jeder Übungsreihe, dann Übung 1–5 wiederholen!
